# Supplementary material for: Mechanism of the antioxidation effect of α-Fe2O3 on silicone rubbers at high temperature
Source: Royal Society of Chemistry journal article supplement (doi:10.1039/c5ra23795e), 2016-01-01
Supplement: c5ra23795e1.pdf [file c5ra23795e1.pdf]

Electronic Supplementary Information for:

## Mechanism of antioxidation effect of $\alpha$ -Fe<sub>2</sub>O<sub>3</sub> on silicone rubber at high temperature

Hua-Feng Fei<sup>a,b</sup>, Xiaojie Han<sup>a,b</sup>, Bozheng Liu<sup>a,b</sup>, Xiyin Gao<sup>a</sup>, Qian Wang<sup>a</sup>, Zhijie Zhang<sup>\*a</sup> and Zemin Xie<sup>a</sup>

<sup>a</sup>Beijing National Laboratory for Molecular Sciences (BNLMS), Institute of Chemistry, Chinese Academy of Sciences, Beijing 100190, China.

<sup>b</sup>Graduate University of Chinese Academy of Sciences, Beijing 100049, China.

**Corresponding Author: Dr. Zhijie Zhang**

E-mail: zhangzj@iccas.ac.cn

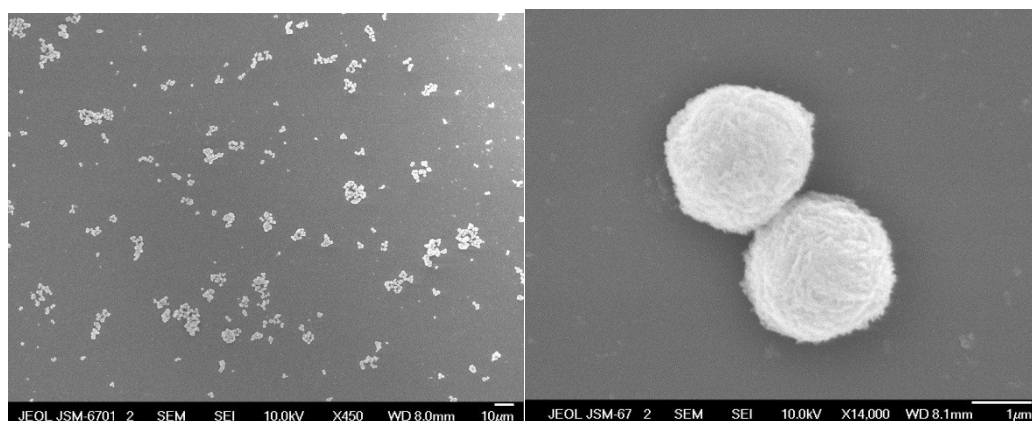

**Figure S1.** SEM images of synthesized  $\alpha$ -Fe<sub>2</sub>O<sub>3</sub>.
